# Supplementary material for: Metabolic Reprogramming Promotes Metastasis of Acidosis-Adapted Pancreatic Ductal Adenocarcinoma Cells Via AMPK/YAP/MMP1 Axis
Source: Research Square preprint supplement (doi:10.21203/rs.3.rs-1068360/v1), 2021-11-23
Supplement: Supplementary file 1 [file d4768507422d473d0dd13f08.docx]

**Supplementary table 1. Primers used in the present study**

| **Primers** | **Sequence** |
| --- | --- |
| E-cadherin | 5′-AGTCACTGACACCAACGATAAT-3′(forward)  5′-ATCGTTGTTCACTGGATTTGTG-3′(reverse) |
| N-cadherin | 5′- CGATAAGGATCAACCCCATACA-3′(forward)  5′-TTCAAAGTCGATTGGTTTGACC-3′(reverse) |
| Vimentin | 5′- CCTTCGTGAATACCAAGACCTGCTC-3′(forward)  5′- AATCCTGCTCTCCTCGCCTTCC-3′(reverse) |
| α-SMA | 5′- CTTCGTTACTACTGCTGAGCGTGAG-3′(forward)  5′- CCCATCAGGCAACTCGTAACTCTTC-3′(reverse) |
| slug | 5′- CTGTGACAAGGAATATGTGAGC-3′(forward)  5′-CTAATGTGTCCTTGAAGCAACC-3′(reverse) |
| snail | 5′- CCTCGCTGCCAATGCTCATCTG-3′(forward)  5′- AGCCTTTCCCACTGTCCTCATCTG-3′(reverse) |
| zeb1 | 5′-CAGGCAAAGTAAATATCCCTGC-3′(forward)  5′-GGTAAAACTGGGGAGTTAGTCA-3′(reverse) |
| zeb2 | 5′-GAAGACAGAGAGTGGCATGTAT-3′(forward)  5′- GTGTGTTCGTATTTATGTCGCA-3′(reverse) |
| MMP1 | 5′-AGATTCTACATGCGCACAAATC-3′ (forward)  5′-CCTTTGAAAAACCGGACTTCAT-3′ (reverse) |
| GAPDH | 5'- GCACCGTCAAGGCTGAGAAC -3'(forward)  5'- TGGTGAAGACGCCAGTGGA -3' (reverse) |

The above primers were used for real-time quantitative PCR experiment.

**Supplementary table 2**. **The fold change of glucose transporters in acidosis-adapted PANC1 cells**

| **Gene** | **Family group** | **Fold change** | **Trend** | **P value** |
| --- | --- | --- | --- | --- |
| SLC2A12 | GLUT | 4.50 | up | 0.01 |
| SLC2A11 | GLUT | 1.42 | up | 0.07 |
| SLC2A1 | GLUT | 1.32 | down | 0.01 |
| SLC2A14 | GLUT | 1.25 | down | 0.04 |
| SLC2A5 | GLUT | 1.01 | down | 0.84 |
| SLC2A8 | GLUT | 2.22 | down | 0.01 |
| SLC2A6 | GLUT | 1.22 | down | 0.11 |
| SLC2A9 | GLUT | 1.43 | down | 0.20 |
| SLC5A12 | SGLT | 1.13 | up | 0.05 |
| SLC5A5 | SGLT | 1.11 | down | 0.23 |
| SLC5A3 | SGLT | 1.00 | up | 0.91 |
| SLC5A6 | SGLT | 1.15 | up | 0.45 |
| SLC5A11 | SGLT | 1.30 | up | 0.01 |
| SLC5A2 | SGLT | 1.00 | up | 0.98 |
| SLC5A10 | SGLT | 1.08 | down | 0.37 |

Change information of glucose transporters in acidosis-adapted PANC1 cells.
